# Supplementary material for: A three-dimensional hydrogel-modified indium tin oxide electrode with enhanced performance for in situ electrochemical detection of extracellular H2O2
Source: Royal Society of Chemistry journal article supplement (doi:10.1039/d1an00875g), 2021-01-01
Supplement: d1an00875g1.pdf [file d1an00875g1.pdf]

**Three-dimensional hydrogel-modified Indium Tin Oxide electrode with enhanced performance for in situ electrochemical detection of extracellular H<sub>2</sub>O<sub>2</sub>**

Shiying Zhou<sup>a</sup>, Xianfeng Wang<sup>a</sup>, Liuyi Jiang<sup>a</sup>, Human Sun<sup>a</sup>, Danqun Huo<sup>a,b\*</sup>, Changjun Hou<sup>a,c\*</sup>.

<sup>a</sup> Key Laboratory for Biorheological Science and Technology of Ministry of Education, State and Local Joint Engineering Laboratory for Vascular Implants, Bioengineering College of Chongqing University, Chongqing 400044, PR China

<sup>b</sup> Chongqing Key Laboratory of Bio-perception & Intelligent Information Processing, School of Microelectronics and Communication Engineering, Chongqing University, Chongqing, 400044, PR China

<sup>c</sup> National Facility for Translational Medicine, Shanghai Jiao Tong University, Shanghai, 200240, PR, China

\* Corresponding author. Tel/ fax: +862365102507 ;

E-mail: houcj@cqu.edu.cn (C.J. Hou)

**For preparation of GCE and ITO electrode**

Firstly, the GCE was polished with 0.3  $\mu\text{m}$  alumina slurry. The GCE was then cleaned in an ultrasonic cleaner for 30s and dried under high purity  $\text{N}_2$ . The electrode was characterized by cyclic voltammetry (CV) with a scanning rate of  $50 \text{ mV s}^{-1}$  in a 5 mM  $[\text{Fe}(\text{CN})_6]^{3-/4-}$  solution including 0.1 M KCl. The peak potential difference was less than 95 mV, indicating that the electrode had been ground for use.

For preparation of ITO electrode, ITO (1 cm $\times$ 2 cm) was ultrasonically washed with acetone, ethanol and distilled water successively, and then dried at room temperature.

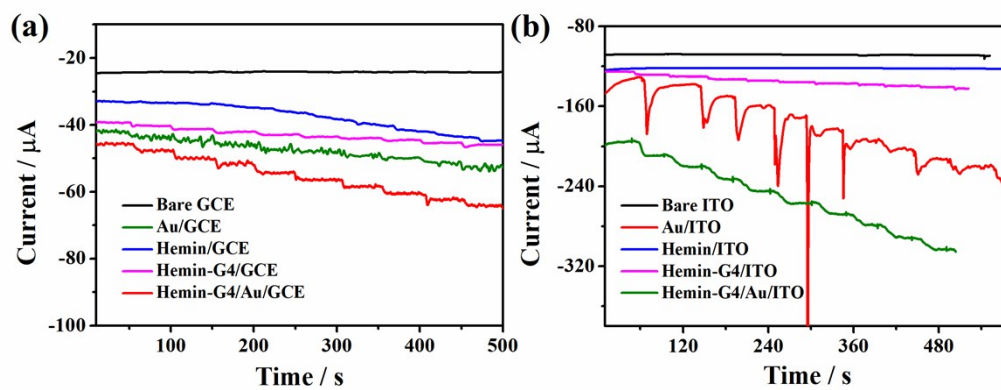

**Fig. S1** Amperometric responses of bare GCE, Au/GCE, Hemin/GCE, Hemin-G4/GCE, and Hemin-G4/Au/GCE (a). Amperometric responses of bare ITO, Au/ITO, Hemin/ITO, Hemin-G4/ITO, and Hemin-G4/Au/ITO (b).

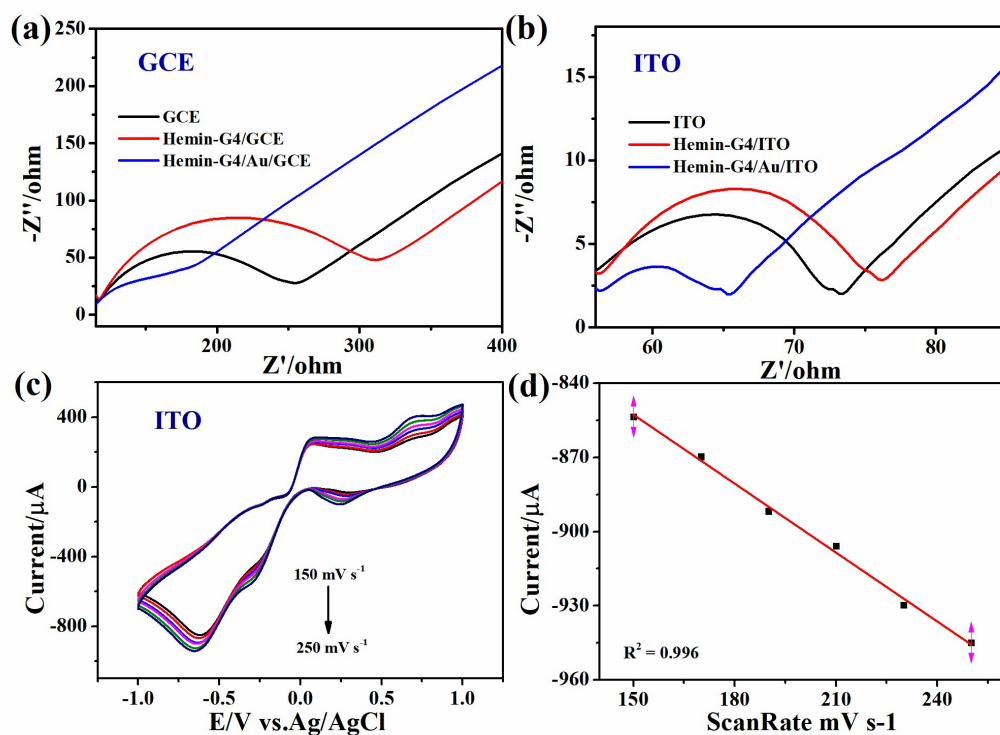

**Fig. S2** EIS of bare GCE, Hemin-G4/GCE and Hemin-G4/Au/GCE in 5 mM  $[\text{Fe}(\text{CN})_6]^{3-/4-}/0.1$  mol/L KCL solution (a); CV of bare ITO, Hemin-G4/ITO and Hemin-G4/Au/ITO in 10 mM  $[\text{Fe}(\text{CN})_6]^{3-/4-}/0.1$  mol/L KCL solution (b).

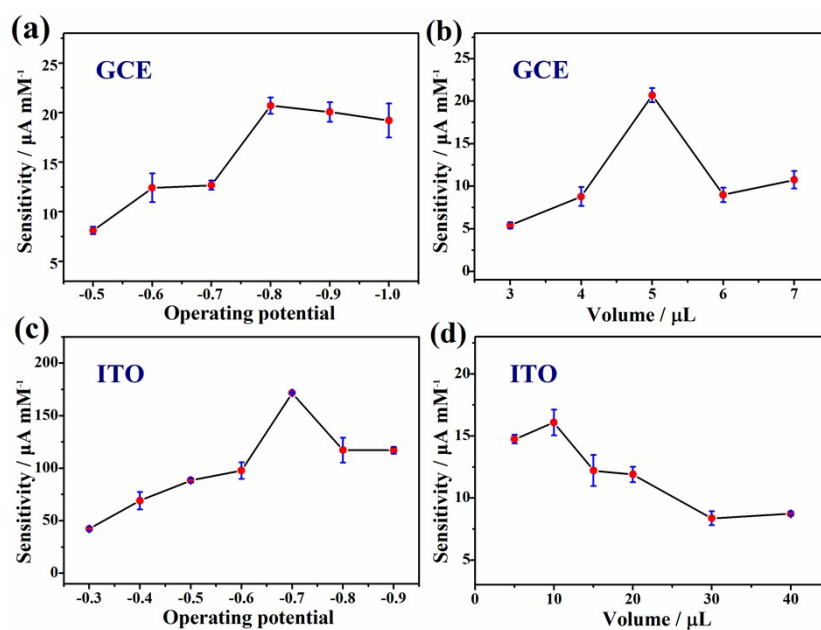

**Fig. S3** Optimization of applied potential and volume of Hemin-G4/Au/GCE (a, b); Optimization of applied potential and volume of Hemin-G4/Au/ITO (c, d).
